# Supplementary material
Source: publisher site journal article supplement (https://www.dovepress.com/article/622588)
Supplement: Supplementary file 1 [file 622588%20Supplementary%20Figure%201.pdf]

## PRISMA 2020 Flow Diagram - Literature Search for Narrative Review: Lenacapavir Spatiotemporal Dynamics

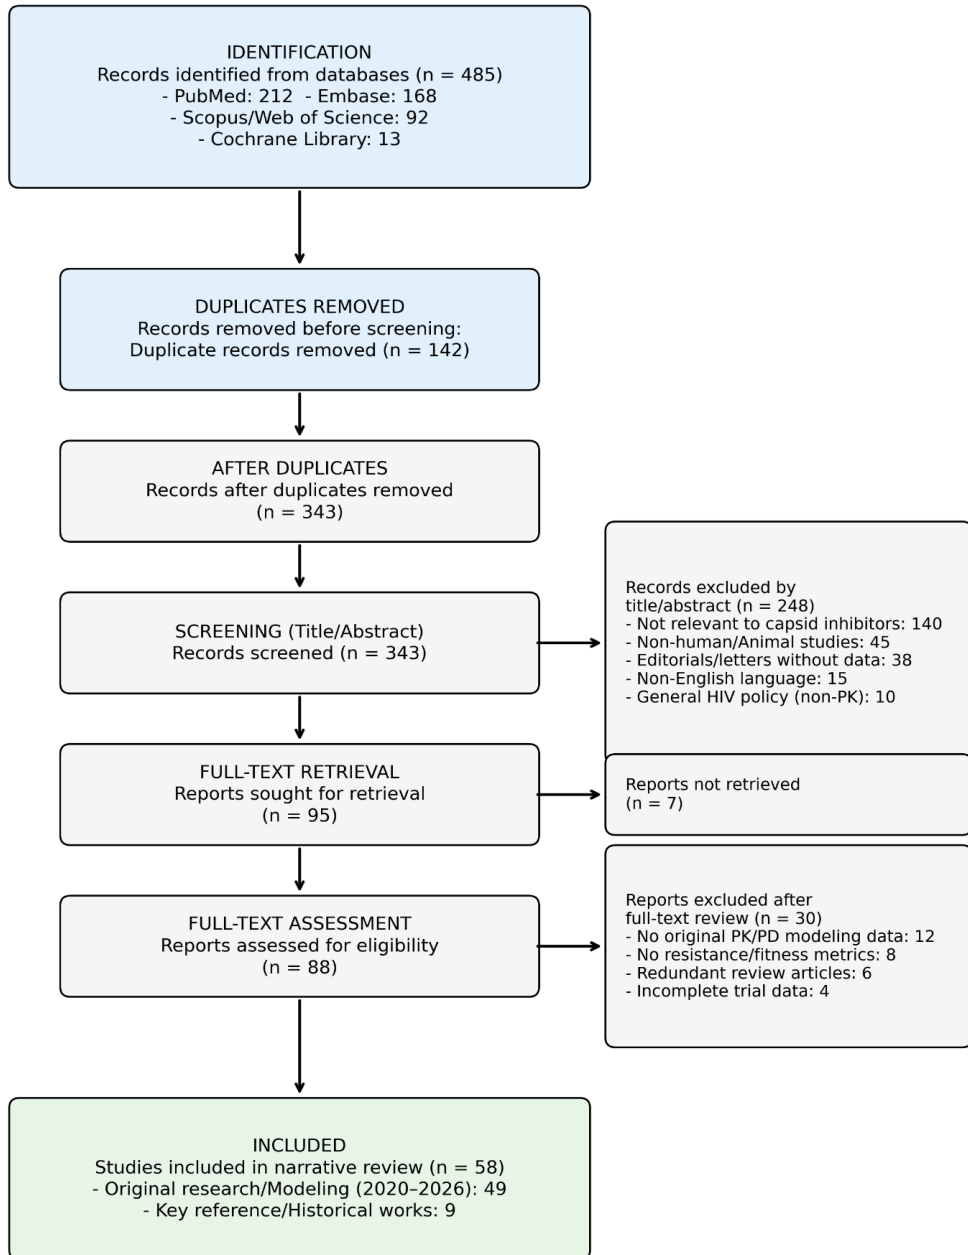

Search date: April 21, 2026. Databases: PubMed, Embase, Scopus, Web of Science, Cochrane Library.
